# Supplementary material for: Looking After Number One: Associations Between Psychopathic Traits and Measures of Social Motivation and Functioning in a Community Sample of Males
Source: Springer Nature journal article supplement (doi:10.1007/s10862-013-9381-2), 2013-09-10
Supplement: MOESM1 [file 571984]

**Appendix**

**Confirmatory Factory Analysis of SRP-4-SF in current sample**

To verify the adequacy of the two-factor model of the SRP-4-SF, confirmatory factor analysis was conducted using Mplus, Version 6.1 (Muthén and Muthén 1998-2010). The two-factor solution (Factor 1: Affective and Interpersonal scales; Factor 2: Lifestyle and Antisocial scales) of the SRP-4-SF showed excellent model fit (X2(1)=0.30, p>.05, CFI=1.00, SRMR=.007). The two-factor model fit significantly better than a one-factor scale-based model via a chi-square difference test between the two models (X2(1)=4.42, p<.05). Finally, although we relied upon a two-factor conception of psychopathy in the current study given the large research literature on this model, it is worth noting that the SRP-SF four-factor model also fit the data acceptably (e.g., CFI=.90, RMSEA=.05), consistent with other recent SRP studies of non-forensic samples (Carré et al. 2012).

Reference

Muthén, L. K., & Muthén, B. O. (1998-2010). *Mplus User’s Guide* (6th ed.). Los Angeles, CA: Muthén & Muthén.
