# Supplementary material for: Looking After Number One: Associations Between Psychopathic Traits and Measures of Social Motivation and Functioning in a Community Sample of Males
Source: Springer Nature journal article supplement (doi:10.1007/s10862-013-9381-2), 2013-09-10
Supplement: MOESM2 [file 571984]

**Looking after number one: Associations between psychopathic traits and measures of social reward and functioning in a community sample of males**

*Journal of Psychopathology and Behavioral Assessment*

**Table 2. Descriptive statistics for all experimental variables**

|  | **Reliability (Cronbach’s Alpha)** | **Minimum** | **Maximum** | **Mean** | **SD** |
| --- | --- | --- | --- | --- | --- |
| **Age** |  | 18.00 | 54.00 | 26.76 | 7.45 |
| **SRP-4-SF** |  |  |  |  |  |
| Total | .87 | 30.00 | 100.00 | 58.40 | 13.96 |
| Affective/interpersonal | .80 | 14.00 | 53.00 | 29.91 | 7.96 |
| Lifestyle/antisocial | .80 | 14.00 | 48.00 | 27.44 | 7.37 |
| **Aspirations** |  |  |  |  |  |
| Image | .71 | -3.09 | 0.68 | -1.26 | 0.86 |
| Community | .72 | -3.19 | 3.70 | 1.06 | 1.37 |
| Affiliation | .81 | -0.48 | 4.32 | 1.57 | 1.04 |
| Money | .86 | -3.26 | 2.38 | -0.41 | 1.23 |
| Popularity | .67 | -3.30 | 3.30 | -0.48 | 1.16 |
| Conformity | .75 | -3.53 | 1.33 | -1.02 | 1.13 |
| Hedonism | .78 | -3.00 | 4.00 | 0.81 | 1.31 |
| **Questionnaires** |  |  |  |  |  |
| Friendship | .85 | 2.00 | 4.77 | 3.81 | 0.55 |
| Need to belong | .75 | 1.70 | 4.80 | 3.23 | 0.57 |
| Social comparison | .81 | 32.00 | 98.00 | 64.63 | 11.22 |
| **Vignettes: Likeability** |  |  |  |  |  |
| Submissive/warm | .721 | 1.33 | 4.67 | 3.21 | 0.51 |
| Submissive/cold | .871 | 1.17 | 3.83 | 2.21 | 0.54 |
| Dominant/warm | .831 | 1.50 | 4.83 | 3.47 | 0.57 |
| Dominant/cold | .891 | 1.00 | 3.83 | 1.98 | 0.59 |
| **Vignettes: Similarity** |  |  |  |  |  |
| Submissive/warm |  | 1.50 | 4.33 | 2.74 | 0.54 |
| Submissive/cold |  | 1.00 | 3.50 | 1.93 | 0.62 |
| Dominant/warm |  | 1.33 | 5.00 | 3.09 | 0.67 |
| Dominant/cold |  | 1.00 | 4.33 | 1.93 | 0.72 |
| **Vignettes: Desirability** |  |  |  |  |  |
| Submissive/warm |  | 1.83 | 3.83 | 2.82 | 0.45 |
| Submissive/cold |  | 1.00 | 3.00 | 1.79 | 0.47 |
| Dominant/warm |  | 2.00 | 4.83 | 3.47 | 0.54 |
| Dominant/cold |  | 1.00 | 3.50 | 1.81 | 0.55 |

1Reliability figure for each character type, collapsed across the three subscales (likeability, similarity, desirability)
