# Supplementary material for: Looking After Number One: Associations Between Psychopathic Traits and Measures of Social Motivation and Functioning in a Community Sample of Males
Source: Springer Nature journal article supplement (doi:10.1007/s10862-013-9381-2), 2013-09-10
Supplement: MOESM3 [file 571984]

**Looking after number one: Associations between psychopathic traits and measures of social reward and functioning in a community sample of males**

*Journal of Psychopathology and Behavioral Assessment*

**Table 3. Correlations between all experimental variables**

|  | 1 | 2 | 3 | 4 | 5 | 6 | 7 | 8 | 9 | 10 | 11 | 12 | 13 | 14 | 15 | 16 | 17 | 18 | 19 | 20 | 21 |
| --- | --- | --- | --- | --- | --- | --- | --- | --- | --- | --- | --- | --- | --- | --- | --- | --- | --- | --- | --- | --- | --- |
| **Aspirations** |  |  |  |  |  |  |  |  |  |  |  |  |  |  |  |  |  |  |  |  |  |
| 1. Image |  |  |  |  |  |  |  |  |  |  |  |  |  |  |  |  |  |  |  |  |  |
| 2. Community | -.37** |  |  |  |  |  |  |  |  |  |  |  |  |  |  |  |  |  |  |  |  |
| 3. Affiliation | -.60** | .34** |  |  |  |  |  |  |  |  |  |  |  |  |  |  |  |  |  |  |  |
| 4. Money | .16 | -.54** | -.50** |  |  |  |  |  |  |  |  |  |  |  |  |  |  |  |  |  |  |
| 5. Popularity | -.04 | -.06 | -.22* | -0.15 |  |  |  |  |  |  |  |  |  |  |  |  |  |  |  |  |  |
| 6. Conformity | .14 | -.32** | -.49** | .17 | -.02 |  |  |  |  |  |  |  |  |  |  |  |  |  |  |  |  |
| 7. Hedonism | -.23* | -.01 | .34** | -.27** | -.30** | -.52** |  |  |  |  |  |  |  |  |  |  |  |  |  |  |  |
| **Questionnaires** |  |  |  |  |  |  |  |  |  |  |  |  |  |  |  |  |  |  |  |  |  |
| 8. Friendship | -.35** | .18 | .34** | -.21* | -.02 | -.06 | .10 |  |  |  |  |  |  |  |  |  |  |  |  |  |  |
| 9. Need to belong | -.04 | -.25* | -.10 | .14 | .23* | .07 | -.02 | .26** |  |  |  |  |  |  |  |  |  |  |  |  |  |
| 10. Social comparison | -.07 | -.12 | .01 | .03 | .00 | .15 | -.02 | .29** | .11 |  |  |  |  |  |  |  |  |  |  |  |  |
| **Vignettes: Likeability** |  |  |  |  |  |  |  |  |  |  |  |  |  |  |  |  |  |  |  |  |  |
| 11. Submissive/warm | -.08 | .19 | .00 | -.04 | .13 | .02 | -.20* | .09 | .05 | .10 |  |  |  |  |  |  |  |  |  |  |  |
| 12. Submissive/cold | .06 | .05 | -.11 | -.02 | .18 | .09 | -.19 | -.25* | -.14 | -.11 | .52** |  |  |  |  |  |  |  |  |  |  |
| 13. Dominant/warm | -.03 | .14 | .00 | -.14 | .10 | .02 | -.05 | .17 | .11 | .32** | .33** | .04 |  |  |  |  |  |  |  |  |  |
| 14. Dominant/cold | .17 | -.10 | -.27** | .12 | .03 | .18 | -.12 | -.22* | .02 | .17 | -.11 | .34** | .23* |  |  |  |  |  |  |  |  |
| **Vignettes: Similarity** |  |  |  |  |  |  |  |  |  |  |  |  |  |  |  |  |  |  |  |  |  |
| 15. Submissive/warm | .14 | .00 | -.20* | .06 | .23* | .03 | -.20* | -.23* | .09 | -.43** | .42** | .41** | .21 | -.05 |  |  |  |  |  |  |  |
| 16. Submissive/cold | .25* | -.19 | -.24* | .10 | .09 | .08 | -.05 | -.46** | .10 | -.39** | .13 | .63** | -.19 | .29** | .58** |  |  |  |  |  |  |
| 17. Dominant/warm | -.11 | .12 | .05 | -.10 | .00 | -.04 | .10 | .23* | .15 | .35** | -.06 | -.30** | .58** | .30** | -.34** | -.41** |  |  |  |  |  |
| 18. Dominant/cold | .08 | -.07 | -.10 | .09 | .01 | .05 | -.06 | -.12 | .12 | .17 | -.10 | .11 | .24* | .77** | .17 | .18 | .51** |  |  |  |  |
| **Vignettes: Desirability** |  |  |  |  |  |  |  |  |  |  |  |  |  |  |  |  |  |  |  |  |  |
| 19. Submissive/warm | -.02 | .12 | -.11 | -.03 | .07 | .11 | -.11 | -.03 | .12 | .18 | .60** | .35** | .29** | .18 | .36** | .21* | .18 | .17 |  |  |  |
| 20. Submissive/cold | .20* | -.10 | -.18 | .02 | .11 | .18 | -.20* | -.24* | .00 | -.19 | .04 | .62** | -.10 | .55** | .28** | .60** | -.13 | .39** | .32** |  |  |
| 21. Dominant/warm | -.11 | .23* | .03 | -.19 | .08 | -.05 | .06 | .17 | .05 | .08 | .09 | -.01 | .69** | .29** | .09 | -.12 | .60** | .33** | .22* | .05 |  |
| 22. Dominant/cold | .20* | -.14 | -.18 | .11 | -.10 | .19 | -.08 | -.16 | .07 | .02 | -.20* | .20* | .14 | .82** | -.01 | .32** | .26** | .69** | .14 | .56** | .32** |

Pearson correlation coefficients are reported; **p<0.01, *p<0.05 (2-tailed)
